# Supplementary material for: Cooking Frequency and Perception of Diet among US Adults Are Associated with US Healthy and Healthy Mediterranean-Style Dietary Related Classes: A Latent Class Profile Analysis
Source: PubMed Central journal article supplement (PMC7693972; doi:10.3390/nu12113268), 2020-10-25
Supplement: nutrients-12-03268-s001.pdf [file nutrients-12-03268-s001.pdf]

1 Supplement Table 1. Daily HEI components by Latent Classes of the 2007-2010 NHANES  
 2 population (age ≥ 19 years, N=11,481) compared to reported U.S. average scores of HEI-2010  
 3 components as reported in Guenther, 2014.

4

| Component        | Mean U.S. HEI scores Mean (SE) | Class 1<br>SAD | Class 2<br>SAD with low sodium | Class 3<br>Healthy US | Class 4<br>Healthy US with high vegetable | Class 5<br>Healthy US with low sodium |
|------------------|--------------------------------|----------------|--------------------------------|-----------------------|-------------------------------------------|---------------------------------------|
| Total vegetable  | 3.2 (0.0)                      | 1.87(1.42)     | 2.23 (1.73)                    | 3.33 (1.60)           | 4.09 (1.14)                               | 3.10 (1.40)                           |
| Green/beans      | 1.6 ( 0.1)                     | 0.04 (0.18)    | 0.02 (0.12)                    | 0.04 (0.19)           | 4.91 (0.28)                               | 2.52 (0.67)                           |
| Total fruit      | 2.7 ( 0.1)                     | 1.19 (1.72)    | 2.32 (2.17)                    | 2.76 (2.14)           | 2.52 (2.13)                               | 2.31 (2.04)                           |
| Whole grains     | 1.9 (0.1)                      | 1.12 (2.10)    | 2.51 (3.31)                    | 2.78 (3.37)           | 2.48 (3.24)                               | 2.13 (3.01)                           |
| Dairy            | 6.1 ( 0.1)                     | 5.00 (3.36)    | 6.72 (3.35)                    | 4.43 (3.37)           | 4.66 (3.38)                               | 4.99 (3.25)                           |
| Total protein    | 4.5 ( 0.0)                     | 4.56 (0.66)    | 1.68 (0.92)                    | 4.69 (0.61)           | 4.65 (0.92)                               | 4.55 (1.01)                           |
| Seafood          | 3.1 ( 0.1)                     | 1.39 (1.99)    | 0.83 (1.50)                    | 2.27 (2.29)           | 2.47 (2.25)                               | 2.66 (2.20)                           |
| Fatty acid       | 4.3 ( 0.1)                     | 3.25 (3.08)    | 3.37 (3.50)                    | 6.46 (3.33)           | 5.90 (3.50)                               | 5.29 (3.45)                           |
| Sodium *         | 4.9 (0.1)                      | 5.54 (3.46)    | 6.17 (3.40)                    | 3.57 (3.41)           | 3.99 (3.50)                               | 4.26 (3.60)                           |
| Refined grains * | 5.6 (0.2)                      | 6.42 (3.50)    | 4.93 (3.95)                    | 5.73 (3.73)           | 6.12 (3.73)                               | 5.62 (3.64)                           |
| SoFAAS *         | 9.4 (0.2)                      | 6.31 (4.35)    | 9.31 (6.43)                    | 16.27 (3.61)          | 14.61 (5.50)                              | 12.56 (5.81)                          |

5

|                                           |                                                        |                                              |
|-------------------------------------------|--------------------------------------------------------|----------------------------------------------|
| SAD (Class1,2) vs Healthy US (Class3,4,5) | Low veg<br>Low seafood<br>Low fatty acid<br>Low sodium | High fatty acid<br>High sodium<br>Low SoFAAS |
|-------------------------------------------|--------------------------------------------------------|----------------------------------------------|

6

7 Note: SAD Standard American Diet

8 \* Lower numerical scores indicate higher consumption.

9

10

11

12

13

14

15

16 Supplement Table 2. Dinner HEI components by Latent Classes of the 2007-2010 NHANES  
 17 population (age ≥ 19 years, N=10,556) compared to reported U.S. average scores of HEI-2010  
 18 components as reported in Guenther, 2014.

19

20

| Component       |                                | Class 1     | Class 2                     | Class 3                      | Class 4                               | Class 5                            | Class 6                           |
|-----------------|--------------------------------|-------------|-----------------------------|------------------------------|---------------------------------------|------------------------------------|-----------------------------------|
|                 | Mean U.S. HEI scores Mean (SE) | SAD dinner  | SAD dinner with high sodium | SAD dinner with high seafood | Healthy US dinner with high vegetable | Healthy Mediterranean style dinner | Healthy US dinner with low sodium |
| Total vegetable | 3.2 (0.0)                      | 1.24 (1.65) | 3.17 (1.97)                 | 2.82 (2.03)                  | 4.59 (0.88)                           | 4.48 (0.99)                        | 2.82 (2.33)                       |
| Green/beans     | 1.6 ( 0.1)                     | 0.01 (0.15) | 0.03 (0.20)                 | 0.09 (0.38)                  | 4.92 (0.34)                           | 4.89 (0.42)                        | 0.02 (0.20)                       |
| Total fruit     | 2.7 ( 0.1)                     | 0.62 (1.53) | 0.69 (1.59)                 | 0.88 (1.71)                  | 0.79 (1.68)                           | 0.80 (1.63)                        | 1.63 (2.26)                       |
| Whole grains    | 1.9 (0.1)                      | 0.85 (2.60) | 0.65 (2.16)                 | 1.07 (2.81)                  | 0.66 (2.22)                           | 0.92 (2.64)                        | 1.80 (3.68)                       |
| Dairy           | 6.1 ( 0.1)                     | 7.16 (4.05) | 3.00 (3.71)                 | 2.67 (3.67)                  | 2.93 (6.64)                           | 2.67 (3.54)                        | 1.81 (3.14)                       |
| Total protein   | 4.5 ( 0.0)                     | 0.65 (0.88) | 4.76 (0.56)                 | 4.59 (0.93)                  | 4.44 (1.40)                           | 4.88 (0.53)                        | 0.36 (0.66)                       |
| Seafood         | 3.1 ( 0.1)                     | 0.04 (0.27) | 0.04 (0.26)                 | 4.83 (0.51)                  | 0.13 (0.44)                           | 4.81 (0.55)                        | 0.04 (0.25)                       |
| Fatty acid      | 4.3 ( 0.1)                     | 1.14 (2.31) | 5.00 (3.88)                 | 7.19 (3.79)                  | 5.71 (3.91)                           | 7.13 (3.75)                        | 8.98 (2.36)                       |
| Sodium *        | 4.9 (0.1)                      | 4.99 (4.23) | 3.30 (3.70)                 | 3.55 (3.91)                  | 2.68 (3.55)                           | 3.23 (3.73)                        | 5.37 (4.30)                       |
| Refined grains* | 5.6 (0.2)                      | 3.94 (4.42) | 5.84 (4.10)                 | 5.77 (4.16)                  | 6.36 (4.04)                           | 5.79 (4.19)                        | 5.95 (4.51)                       |
| SoFAAS *        | 9.4 (0.2)                      | 7.55 (7.02) | 13.41(6.60)                 | 14.61 (6.46)                 | 15.21 (5.85)                          | 15.89 (5.68)                       | 15.70 (6.73)                      |

21

|                                                                     |                                                        |                               |
|---------------------------------------------------------------------|--------------------------------------------------------|-------------------------------|
| SAD (Class 1,2,3)<br>vs Healthy US or<br>Med Style<br>(Class 4,5,6) | Low veg<br>Low seafood<br>Low fatty acid<br>Low sodium | High fatty acid<br>Low SoFAAS |
|---------------------------------------------------------------------|--------------------------------------------------------|-------------------------------|

22 Note: SAD Standard American Diet

23 \* Lower numerical scores indicate higher consumption.

24

25

26

27

28 Supplement Table 3. Prevalence of Daily and Dinner Latent Classes by Gender

|                                                 | n (%)                |                    | p value |
|-------------------------------------------------|----------------------|--------------------|---------|
|                                                 | Female<br>(n = 5058) | Male<br>(n = 5623) |         |
| <b>Daily latent classes</b>                     |                      |                    |         |
| Class 1 (SAD)                                   | 1296 (22.1)          | 1612 (28.6)        | < .001  |
| Class 2 (SAD with low sodium)                   | 896 (15.3)           | 672 (12.0)         |         |
| Class 3 (Healthy US)                            | 1958 (33.4)          | 1840 (32.7)        |         |
| Class 4 (Healthy US with high vegetable)        | 1339 (22.9)          | 1163 (20.7)        |         |
| Class 5 (Healthy US with low sodium)            | 369 ( 6.3)           | 336 ( 6.0)         |         |
| <b>Dinner latent classes</b>                    |                      |                    |         |
| Class 1 (SAD dinner)                            | 762 (14.1)           | 669 (13.0)         | < .001  |
| Class 2 (SAD dinner with high sodium)           | 2471 (45.7)          | 2557 (49.6)        |         |
| Class 3 (SAD dinner with high seafood)          | 710 (13.1)           | 670 (13.0)         |         |
| Class 4 (Healthy US dinner with high vegetable) | 755 (14.0)           | 641 (12.4)         |         |
| Class 5 (Healthy Mediterranean style dinner)    | 374 ( 6.9)           | 363 ( 7.0)         |         |
| Class 6 (Healthy US dinner with low sodium)     | 333 ( 6.2)           | 251 ( 5.0)         |         |

29 Note: SAD Standard American Diet

30

31
